# Supplementary material for: Rational electrolyte design for Li-metal batteries operated under extreme conditions: a combined DFT, COSMO-RS, and machine learning study
Source: Royal Society of Chemistry journal article supplement (doi:10.1039/d4ta03026e), 2024-01-01
Supplement: d4ta03026e1.pdf [file d4ta03026e1.pdf]

**Rational Electrolytes Design for Li-Metal Batteries Operated Under Extreme  
Conditions: A Combined DFT, COSMO-RS, and Machine Learning Study**

Liang-Ting Wu,<sup>a</sup> Yu-Ting Zhan,<sup>a</sup> Zhong-Lun Li,<sup>a</sup> Po-Ting Chen,<sup>a</sup> Bing Joe Hwang,<sup>a,b</sup>  
and Jyh-Chiang Jiang<sup>a\*</sup>

<sup>a</sup> Department of Chemical Engineering, National Taiwan University of Science and Technology, Taipei 106, Taiwan; Sustainable Electrochemical Energy Development Center (SEED Center), National Taiwan University of Science and Technology, Taipei 106, Taiwan

<sup>b</sup> National Synchrotron Radiation Research Center (NSRRC), Hsinchu 30076, Taiwan

**Corresponding Author**

\*Jyh-Chiang Jiang. Email: [jcjiang@mail.ntust.edu.tw](mailto:jcjiang@mail.ntust.edu.tw)

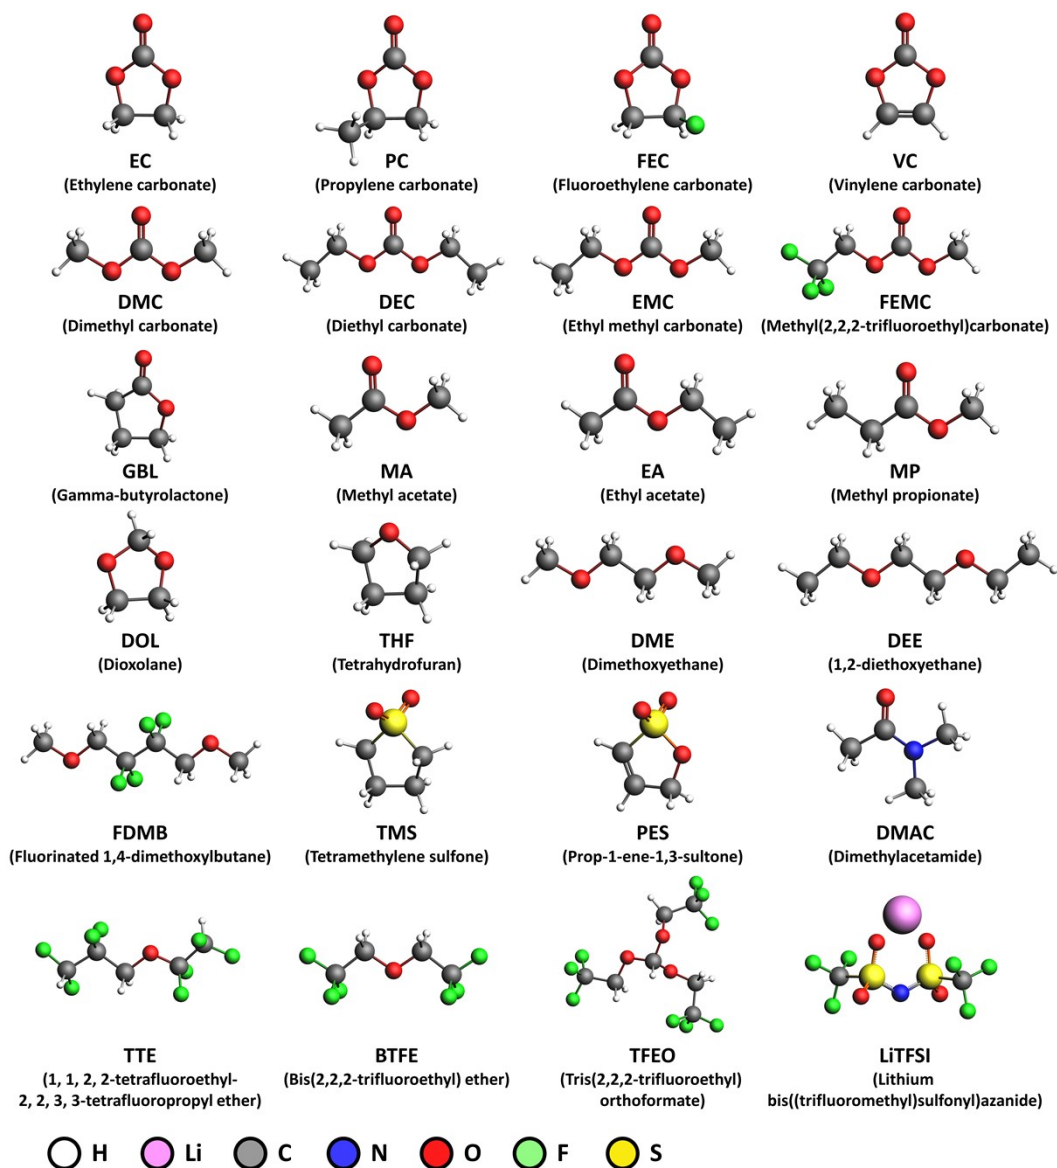

**Figure S1.** Optimized structures of 20 solvents, 3 diluents (TTE, BTFE, TFEO), and a lithium salt (LiTFSI). The common organic solvents include cyclic carbonates (EC, PC, FEC, VC), linear carbonate (DMC, DEC, EMC, FEMC), cyclic ester (GBL), linear ester (MA, EA, MP), cyclic ether (DOL, THF), linear ether (DME, DEE, FDMB), sulfone (TMS), sultone (PES), and amide (DMAC).

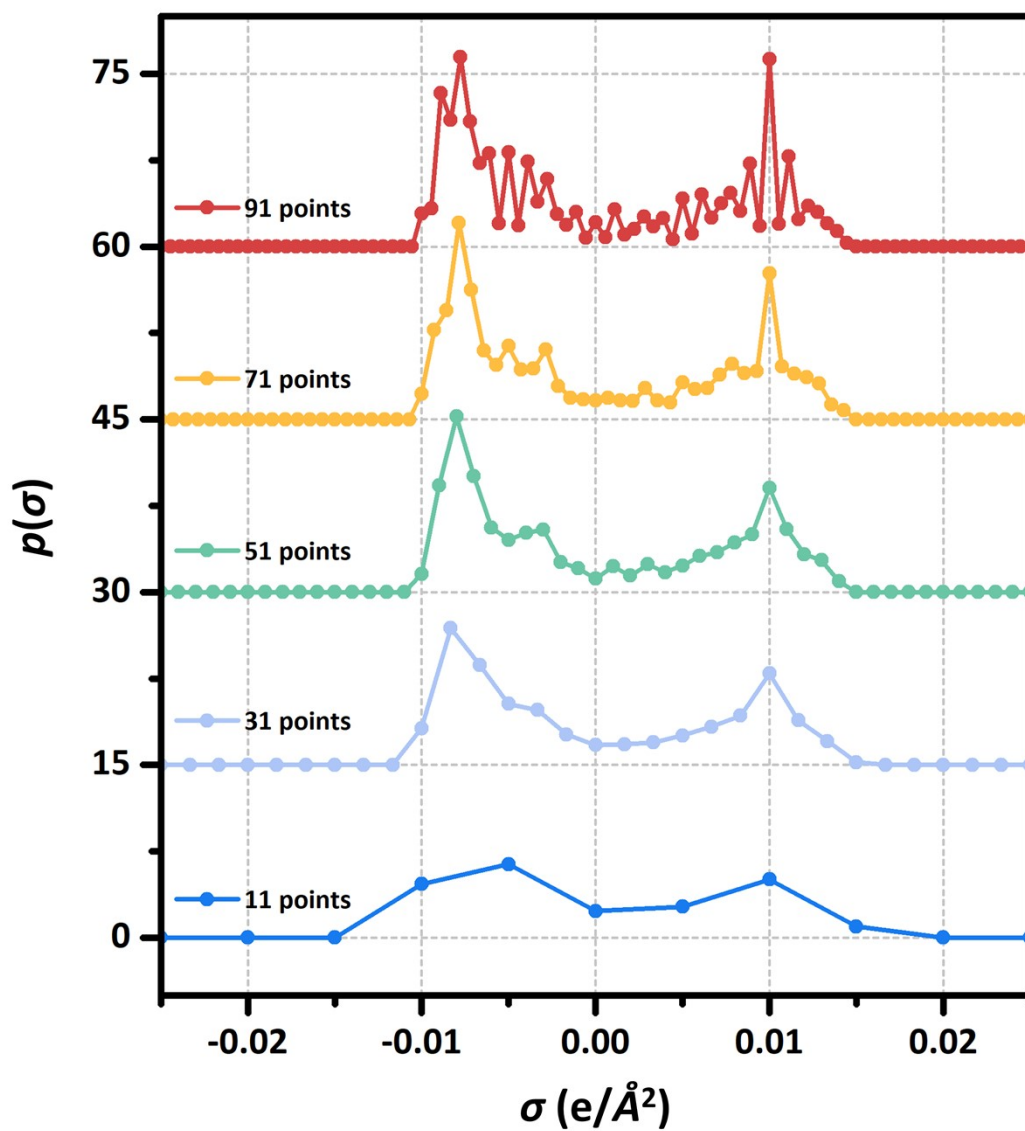

**Figure S2.** The  $\sigma$ -profiles of EC with various numbers of points, 11, 31, 51, 71, and 91, within the screening charge range of 0.025 to -0.025  $e \text{\AA}^{-2}$

**Table S1.** The melting point (mp in K), boiling point (bp in K), and enthalpy of fusion ( $\Delta H_f$  in  $\text{kJ mol}^{-1}$ ) of 20 common organic solvents. <sup>a</sup> From Sigma-Aldrich; <sup>b</sup> From indagochem; <sup>c</sup> Predicted from QSPR in AMS.

| Solvents | Melting Point (K)   | Boiling Point (K)   | Enthalpy of fusion ( $\text{kJ mol}^{-1}$ ) |
|----------|---------------------|---------------------|---------------------------------------------|
| EC       | 309.48 <sup>1</sup> | 519.15 <sup>1</sup> | 13.02 <sup>2</sup>                          |
| PC       | 224.35 <sup>1</sup> | 514.75 <sup>1</sup> | 8.96 <sup>2</sup>                           |
| FEC      | 290.45 <sup>3</sup> | 485.15 <sup>4</sup> | 15.95 <sup>c</sup>                          |
| VC       | 293.65 <sup>a</sup> | 435.15 <sup>a</sup> | 15.79 <sup>c</sup>                          |
| DMC      | 272.15 <sup>1</sup> | 363.26 <sup>1</sup> | 11.58 <sup>2</sup>                          |
| DEC      | 230.15 <sup>1</sup> | 399.05 <sup>1</sup> | 9.24 <sup>2</sup>                           |
| EMC      | 259.15 <sup>1</sup> | 380.65 <sup>1</sup> | 11.24 <sup>2</sup>                          |
| FEMC     | 229.00 <sup>5</sup> | 363.00 <sup>5</sup> | 16.64 <sup>c</sup>                          |
| GBL      | 229.79 <sup>1</sup> | 477.75 <sup>1</sup> | 9.57 <sup>1</sup>                           |
| MA       | 174.90 <sup>1</sup> | 329.85 <sup>1</sup> | 7.49 <sup>1</sup>                           |
| EA       | 189.35 <sup>1</sup> | 350.25 <sup>1</sup> | 10.48 <sup>1</sup>                          |
| MP       | 185.65 <sup>1</sup> | 351.75 <sup>1</sup> | 17.02 <sup>c</sup>                          |
| DOL      | 175.94 <sup>1</sup> | 348.45 <sup>1</sup> | 6.57 <sup>1</sup>                           |
| THF      | 164.77 <sup>1</sup> | 339.15 <sup>1</sup> | 8.54 <sup>1</sup>                           |
| DME      | 204.15 <sup>1</sup> | 358.15 <sup>1</sup> | 14.01 <sup>c</sup>                          |
| DEE      | 199.15 <sup>a</sup> | 394.15 <sup>a</sup> | 15.44 <sup>c</sup>                          |
| FDMB     | 224.15 <sup>c</sup> | 405.82 <sup>c</sup> | 21.17 <sup>c</sup>                          |
| TMS      | 301.60 <sup>1</sup> | 559.15 <sup>1</sup> | 1.372 <sup>6</sup>                          |
| PES      | 355.65 <sup>b</sup> | 529.75 <sup>b</sup> | 16.95 <sup>c</sup>                          |
| DMAC     | 254.15 <sup>1</sup> | 439.05 <sup>1</sup> | 15.78 <sup>c</sup>                          |

**Table S2.** The calculated bubble point temperature (K) in the upper triangular matrix and eutectic temperature (K) in the lower triangular matrix for 190 binary mixtures at their eutectic compositions.

|      | EC      | PC      | FEC     | VC      | DMC     | DEC     | EMC     | FEMC    | GBL     | MA      | EA      | MP      | DOL     | THF     | DME     | DEE     | FDMB    | TMS     | PES     | DMAC    |
|------|---------|---------|---------|---------|---------|---------|---------|---------|---------|---------|---------|---------|---------|---------|---------|---------|---------|---------|---------|---------|
| EC   |         | 515.003 | 499.843 | 457.788 | 374.683 | 401.474 | 387.781 | 366.859 | 481.843 | 330.266 | 350.873 | 352.264 | 349.057 | 339.463 | 359.327 | 394.666 | 408.421 | 550.371 | 522.307 | 447.906 |
| PC   | 219.031 |         | 508.773 | 492.929 | 419.381 | 425.69  | 429.616 | 400.496 | 494.838 | 336.618 | 360.378 | 361.546 | 356.334 | 343.383 | 374.265 | 403.349 | 442.191 | 541.879 | 515.14  | 484.915 |
| FEC  | 259.525 | 213.205 |         | 454.192 | 381.625 | 404.798 | 394.016 | 366.145 | 483.011 | 331.608 | 352.567 | 353.66  | 351.415 | 341.501 | 362.497 | 396.199 | 409.272 | 538.482 | 492.68  | 455.247 |
| VC   | 266.832 | 216.803 | 264.092 |         | 377.683 | 402.466 | 390.483 | 366.51  | 467.392 | 330.788 | 351.793 | 353.002 | 349.882 | 340.446 | 361.35  | 395.342 | 407.784 | 508.63  | 443.907 | 441.807 |
| DMC  | 256.537 | 212.974 | 244.566 | 248.361 |         | 384.995 | 371.735 | 364.918 | 409.449 | 330.984 | 351.112 | 352.418 | 349.183 | 339.654 | 358.432 | 387.596 | 388.042 | 425.147 | 367.272 | 387.966 |
| DEC  | 227.172 | 204.173 | 222.21  | 223.001 | 217.518 |         | 391.883 | 381.795 | 420.483 | 334.807 | 358.165 | 359.499 | 352.766 | 343.288 | 369.578 | 395.216 | 402.361 | 445.989 | 399.617 | 406.449 |
| EMC  | 250.233 | 211.933 | 240.612 | 242.519 | 234.294 | 213.263 |         | 371.511 | 419.068 | 331.739 | 352.912 | 354.123 | 350.033 | 340.39  | 361.706 | 390.645 | 395.498 | 438.656 | 382.748 | 398.829 |
| FEMC | 226.115 | 201.528 | 226.593 | 225.943 | 215.448 | 200.314 | 211.524 |         | 398.564 | 334.135 | 354.595 | 355.609 | 352.14  | 343.135 | 362.612 | 383.131 | 379.324 | 427.68  | 363.506 | 383.44  |
| GBL  | 223.053 | 197.138 | 210.197 | 216.248 | 215.694 | 203.883 | 213.435 | 195.212 |         | 335.888 | 359.992 | 361.323 | 354.597 | 342.517 | 373.057 | 403.382 | 434.828 | 520.54  | 479.938 | 463.587 |
| MA   | 174.453 | 168.149 | 172.94  | 173.874 | 173.075 | 169.128 | 172.41  | 168.138 | 168.752 |         | 334.987 | 333.99  | 338.101 | 333.468 | 332.906 | 333.772 | 331.717 | 360.159 | 329.933 | 330.929 |
| EA   | 188.833 | 181.696 | 187.326 | 187.977 | 186.776 | 180.953 | 185.626 | 180.35  | 181.762 | 162.522 |         | 350.932 | 348.458 | 341.629 | 352.483 | 358.918 | 354.385 | 386.295 | 350.39  | 352.713 |
| MP   | 185.4   | 181.234 | 184.671 | 184.992 | 184.282 | 180.632 | 183.611 | 180.522 | 181.166 | 165.505 | 173.378 |         | 348.767 | 341.039 | 353.642 | 360.465 | 355.278 | 390.003 | 351.873 | 353.902 |
| DOL  | 175.24  | 167.27  | 172.153 | 174.171 | 173.628 | 169.278 | 172.906 | 166.388 | 169.119 | 153.23  | 162.162 | 165.311 |         | 341.136 | 349.248 | 351.313 | 350.704 | 379.526 | 348.614 | 349.436 |
| THF  | 164.522 | 161.099 | 162.417 | 163.669 | 163.871 | 161.088 | 163.422 | 158.546 | 162.17  | 151.184 | 157.018 | 159.721 | 151.241 |         | 340.894 | 342.778 | 340.538 | 364.098 | 339.267 | 339.649 |
| DME  | 203.343 | 194.083 | 200.731 | 201.633 | 200.434 | 192.55  | 198.737 | 190.633 | 194.618 | 168.968 | 179.144 | 179.339 | 169.289 | 161.636 |         | 372.793 | 366.594 | 398.404 | 358.454 | 362.6   |
| DEE  | 198.854 | 194.326 | 197.798 | 197.985 | 197.104 | 190.726 | 195.789 | 190.544 | 193.887 | 169.928 | 179.228 | 179.395 | 170.303 | 161.453 | 187.061 |         | 395.715 | 430.076 | 394.655 | 396.467 |
| FDMB | 222.753 | 206.572 | 222.065 | 222     | 216.868 | 205.937 | 214.407 | 210.506 | 203.88  | 172.769 | 185.252 | 183.566 | 172.797 | 163.513 | 196.197 | 194.846 |         | 466.865 | 406.241 | 416.054 |
| TMS  | 224.662 | 173.93  | 185.61  | 203.263 | 207.106 | 187.331 | 202.979 | 165.396 | 184.176 | 147.909 | 164.353 | 169.296 | 148.016 | 147.436 | 181.99  | 185.313 | 189.229 |         | 555.475 | 501.2   |
| PES  | 289.634 | 222.795 | 278.747 | 283.627 | 266.266 | 229.457 | 256.396 | 228.622 | 226.779 | 174.814 | 189.248 | 185.605 | 175.761 | 164.684 | 203.944 | 235.712 | 223.935 | 241.187 |         | 444     |
| DMAC | 245.866 | 213.198 | 230.853 | 234.082 | 234.92  | 216.4   | 230.43  | 208.549 | 217.078 | 173.743 | 187.222 | 184.548 | 174.742 | 164.382 | 200.87  | 197.234 | 214.686 | 212.351 | 249.535 |         |

**Table S3.** The calculated LiTFSI solubility (M) (upper triangular matrix) and mole fraction of solvent A (lower triangular matrix) for 190 binary mixtures at eutectic composition.

|      | EC    | PC    | FEC   | VC    | DMC   | DEC   | EMC   | FEMC  | GBL   | MA    | EA    | MP    | DOL   | THF   | DME   | DEE   | FDMB  | TMS   | PES   | DMAC  |
|------|-------|-------|-------|-------|-------|-------|-------|-------|-------|-------|-------|-------|-------|-------|-------|-------|-------|-------|-------|-------|
| EC   |       | 1.939 | 0.653 | 1.352 | 2.25  | 2.202 | 2.28  | 1.294 | 2.63  | 2.685 | 2.518 | 2.475 | 2.802 | 2.784 | 2.564 | 2.123 | 1.398 | 2.501 | 1.035 | 2.871 |
| PC   | 0.111 |       | 1.657 | 1.89  | 2.088 | 2.185 | 2.124 | 1.667 | 2.356 | 2.581 | 2.442 | 2.41  | 2.66  | 2.745 | 2.449 | 2.173 | 1.751 | 2.446 | 1.934 | 2.346 |
| FEC  | 0.471 | 0.804 |       | 0.905 | 1.723 | 2.08  | 1.942 | 1.232 | 2.197 | 2.616 | 2.452 | 2.421 | 2.679 | 2.715 | 2.454 | 2.089 | 1.343 | 2.252 | 0.477 | 2.441 |
| VC   | 0.467 | 0.854 | 0.518 |       | 2.104 | 2.153 | 2.156 | 1.276 | 2.497 | 2.667 | 2.494 | 2.456 | 2.771 | 2.758 | 2.516 | 2.109 | 1.385 | 2.432 | 1.195 | 2.645 |
| DMC  | 0.287 | 0.77  | 0.388 | 0.361 |       | 2.25  | 2.348 | 1.571 | 2.646 | 2.677 | 2.515 | 2.474 | 2.79  | 2.779 | 2.556 | 2.15  | 1.602 | 2.568 | 2.256 | 2.792 |
| DEC  | 0.064 | 0.534 | 0.151 | 0.141 | 0.251 |       | 2.233 | 1.78  | 2.494 | 2.603 | 2.429 | 2.397 | 2.707 | 2.706 | 2.421 | 2.148 | 1.836 | 2.539 | 2.189 | 2.451 |
| EMC  | 0.184 | 0.736 | 0.309 | 0.289 | 0.43  | 0.68  |       | 1.636 | 2.613 | 2.663 | 2.496 | 2.458 | 2.774 | 2.766 | 2.522 | 2.151 | 1.667 | 2.561 | 2.269 | 2.688 |
| FEMC | 0.11  | 0.64  | 0.092 | 0.114 | 0.369 | 0.586 | 0.427 |       | 2.069 | 2.443 | 2.216 | 2.187 | 2.518 | 2.572 | 2.129 | 1.897 | 1.286 | 2.284 | 1.238 | 2.029 |
| GBL  | 0.139 | 0.537 | 0.277 | 0.226 | 0.274 | 0.497 | 0.318 | 0.401 |       | 2.704 | 2.595 | 2.563 | 2.798 | 2.805 | 2.658 | 2.314 | 2.129 | 2.633 | 2.639 | 2.83  |
| MA   | 0.013 | 0.188 | 0.052 | 0.029 | 0.053 | 0.164 | 0.071 | 0.148 | 0.17  |       | 2.637 | 2.638 | 2.757 | 2.773 | 2.674 | 2.604 | 2.59  | 2.647 | 2.689 | 2.707 |
| EA   | 0.018 | 0.258 | 0.064 | 0.046 | 0.088 | 0.266 | 0.125 | 0.221 | 0.252 | 0.672 |       | 2.501 | 2.725 | 2.725 | 2.537 | 2.383 | 2.347 | 2.611 | 2.518 | 2.568 |
| MP   | 0.015 | 0.25  | 0.053 | 0.037 | 0.079 | 0.264 | 0.115 | 0.214 | 0.248 | 0.744 | 0.541 |       | 2.733 | 2.737 | 2.508 | 2.35  | 2.328 | 2.599 | 2.475 | 2.522 |
| DOL  | 0.018 | 0.202 | 0.079 | 0.042 | 0.058 | 0.163 | 0.075 | 0.163 | 0.165 | 0.484 | 0.318 | 0.25  |       | 2.836 | 2.78  | 2.716 | 2.68  | 2.685 | 2.808 | 2.824 |
| THF  | 0.009 | 0.114 | 0.06  | 0.036 | 0.033 | 0.13  | 0.049 | 0.134 | 0.095 | 0.423 | 0.257 | 0.173 | 0.441 |       | 2.761 | 2.691 | 2.72  | 2.754 | 2.783 | 2.791 |
| DME  | 0.032 | 0.374 | 0.111 | 0.091 | 0.143 | 0.39  | 0.201 | 0.325 | 0.36  | 0.831 | 0.684 | 0.678 | 0.835 | 0.886 |       | 2.32  | 2.244 | 2.637 | 2.564 | 2.64  |
| DEE  | 0.014 | 0.229 | 0.056 | 0.051 | 0.094 | 0.347 | 0.151 | 0.272 | 0.26  | 0.85  | 0.67  | 0.665 | 0.855 | 0.881 | 0.46  |       | 1.998 | 2.546 | 2.117 | 2.215 |
| FDMB | 0.071 | 0.65  | 0.102 | 0.104 | 0.307 | 0.598 | 0.381 | 0.494 | 0.61  | 0.941 | 0.872 | 0.889 | 0.928 | 0.959 | 0.749 | 0.824 |       | 2.322 | 1.365 | 1.966 |
| TMS  | 0.167 | 0.308 | 0.215 | 0.195 | 0.216 | 0.279 | 0.228 | 0.232 | 0.293 | 0.412 | 0.349 | 0.331 | 0.43  | 0.424 | 0.303 | 0.301 | 0.221 |       | 2.443 | 2.706 |
| PES  | 0.714 | 0.967 | 0.767 | 0.789 | 0.89  | 0.985 | 0.944 | 0.985 | 0.938 | 0.997 | 0.996 | 0.997 | 0.995 | 0.997 | 0.992 | 0.987 | 0.988 | 0.88  |       | 2.869 |
| DMAC | 0.214 | 0.765 | 0.362 | 0.36  | 0.449 | 0.733 | 0.529 | 0.582 | 0.738 | 0.966 | 0.927 | 0.936 | 0.969 | 0.985 | 0.872 | 0.91  | 0.649 | 0.791 | 0.113 |       |

**Table S4.** The z-scores corresponding to the seven  $\sigma$ -descriptors of 20 solvents and three diluents.

| <b>Compounds</b> | <b>z1</b> | <b>z2</b> | <b>z3</b> | <b>z4</b> | <b>z5</b> | <b>z6</b> | <b>z7</b> |
|------------------|-----------|-----------|-----------|-----------|-----------|-----------|-----------|
| EC               | -0.218    | -0.506    | 0.415     | -1.731    | -0.397    | 1.020     | -0.685    |
| PC               | -0.218    | -0.582    | 0.780     | -0.885    | -0.425    | 1.068     | -0.685    |
| FEC              | -0.218    | 1.694     | -1.592    | -1.781    | 0.315     | 0.038     | -0.685    |
| VC               | -0.218    | 0.797     | -1.967    | -0.828    | -0.187    | -0.095    | -0.685    |
| DMC              | -0.218    | -0.672    | 0.350     | -0.504    | -0.488    | 0.746     | -0.632    |
| DEC              | -0.218    | -0.672    | 1.190     | 1.188     | -0.498    | 0.849     | -0.580    |
| EMC              | -0.218    | -0.672    | 0.818     | 0.269     | -0.496    | 0.811     | -0.582    |
| FEMC             | -0.218    | 0.521     | -0.279    | -0.031    | 0.731     | -0.021    | -0.685    |
| GBL              | -0.218    | -0.672    | 0.684     | -0.822    | -0.686    | 0.731     | 0.006     |
| MA               | -0.218    | -0.672    | -0.072    | -0.307    | -0.646    | 0.233     | -0.159    |
| EA               | -0.218    | -0.672    | 0.237     | 0.559     | -0.590    | 0.146     | -0.076    |
| MP               | -0.218    | -0.672    | 0.161     | 0.386     | -0.520    | 0.069     | 0.015     |
| DOL              | -0.218    | -0.672    | 0.205     | -0.922    | -0.640    | -0.260    | 0.726     |
| THF              | -0.218    | -0.672    | -1.041    | 1.051     | -0.758    | -1.401    | 1.265     |
| DME              | -0.218    | -0.672    | 0.469     | 0.895     | -0.593    | -0.691    | 1.680     |
| DEE              | -0.218    | -0.672    | 0.724     | 3.208     | -0.374    | -0.866    | 2.149     |
| FDMB             | -0.218    | -0.465    | 2.022     | 0.292     | 1.065     | -0.321    | 0.123     |
| TMS              | -0.218    | -0.602    | 1.515     | -0.667    | -0.745    | 2.076     | -0.678    |
| PES              | -0.218    | 1.119     | -0.520    | -1.239    | -0.420    | 2.083     | -0.685    |
| DMAC             | -0.218    | -0.672    | 0.278     | 0.690     | -0.713    | -1.297    | 4.200     |
| TTE              | 0.512     | 2.520     | -2.346    | 0.122     | 3.035     | -2.155    | -0.685    |
| BTFE             | -0.218    | 1.630     | -1.609    | -0.088    | 1.821     | -1.622    | -0.685    |
| TFEO             | -0.218    | 2.717     | -0.701    | 1.526     | 3.379     | -1.137    | -0.685    |

**Table S5.** The calculated Li<sup>+</sup> binding energy ( $E_{B, Li}$  in eV), and TFSI<sup>-</sup> binding energy ( $E_{B, TFSI}$  in eV) of 20 solvents and 3 diluents.

| Compounds | $E_{B, Li}$ | $E_{B, TFSI}$ |
|-----------|-------------|---------------|
| EC        | -0.712      | -0.259        |
| PC        | -0.722      | -0.295        |
| FEC       | -0.608      | -0.289        |
| VC        | -0.636      | -0.238        |
| DMC       | -0.695      | -0.140        |
| DEC       | -0.715      | -0.149        |
| EMC       | -0.704      | -0.150        |
| FEMC      | -0.593      | -0.250        |
| GBL       | -0.780      | -0.186        |
| MA        | -0.743      | -0.140        |
| EA        | -0.756      | -0.140        |
| MP        | -0.780      | -0.131        |
| DOL       | -0.713      | -0.212        |
| THF       | -0.847      | -0.146        |
| DME       | -0.712      | -0.143        |
| DEE       | -0.753      | -0.148        |
| FDMB      | -0.754      | -0.213        |
| TMS       | -0.779      | -0.203        |
| PES       | -0.580      | -0.248        |
| DMAC      | -1.012      | -0.135        |
| TTE       | -0.460      | -0.297        |
| BTFE      | -0.582      | -0.274        |
| TFEO      | -0.724      | -0.380        |



**Table S6.** The corresponding coefficients of the seven  $\sigma$ -descriptors from 23 CV iterations for Li-ion binding energy prediction.

| <b>CV<br/>Iteration</b> | <b>C1</b> | <b>C2</b> | <b>C3</b> | <b>C4</b> | <b>C5</b> | <b>C6</b> | <b>C7</b> |
|-------------------------|-----------|-----------|-----------|-----------|-----------|-----------|-----------|
| <b>1</b>                | 0.0375    | 0.1179    | 0.0520    | 0.0001    | -0.1091   | -0.0713   | -0.0970   |
| <b>2</b>                | 0.0372    | 0.1118    | 0.0482    | -0.0010   | -0.1028   | -0.0670   | -0.0950   |
| <b>3</b>                | 0.0379    | 0.1597    | 0.0827    | -0.0069   | -0.1616   | -0.1125   | -0.1158   |
| <b>4</b>                | 0.0370    | 0.1125    | 0.0449    | -0.0004   | -0.1050   | -0.0697   | -0.0955   |
| <b>5</b>                | 0.0378    | 0.1248    | 0.0574    | -0.0009   | -0.1152   | -0.0769   | -0.0984   |
| <b>6</b>                | 0.0399    | 0.1385    | 0.0680    | 0.0033    | -0.1352   | -0.0890   | -0.1113   |
| <b>7</b>                | 0.0372    | 0.1132    | 0.0487    | -0.0005   | -0.1043   | -0.0688   | -0.0956   |
| <b>8</b>                | 0.0440    | 0.1590    | 0.0852    | -0.0034   | -0.1572   | -0.1074   | -0.1124   |
| <b>9</b>                | 0.0379    | 0.1159    | 0.0529    | -0.0031   | -0.1072   | -0.0718   | -0.0969   |
| <b>10</b>               | 0.0369    | 0.1090    | 0.0462    | -0.0004   | -0.1005   | -0.0673   | -0.0954   |
| <b>11</b>               | 0.0376    | 0.1153    | 0.0512    | 0.0013    | -0.1100   | -0.0738   | -0.1006   |
| <b>12</b>               | 0.0368    | 0.1056    | 0.0438    | 0.0014    | -0.0999   | -0.0665   | -0.0966   |
| <b>13</b>               | 0.0365    | 0.0963    | 0.0311    | 0.0082    | -0.0821   | -0.0461   | -0.0878   |
| <b>14</b>               | 0.0340    | 0.0866    | 0.0237    | 0.0049    | -0.0894   | -0.0587   | -0.0893   |
| <b>15</b>               | 0.0340    | 0.0702    | 0.0144    | 0.0013    | -0.0561   | -0.0327   | -0.0801   |
| <b>16</b>               | 0.0352    | 0.1078    | 0.0529    | -0.0180   | -0.1034   | -0.0833   | -0.0989   |
| <b>17</b>               | 0.0382    | 0.1127    | 0.0366    | 0.0037    | -0.1050   | -0.0628   | -0.0949   |
| <b>18</b>               | 0.0418    | 0.1299    | 0.0612    | -0.0006   | -0.1164   | -0.0636   | -0.0975   |
| <b>19</b>               | 0.0370    | 0.1338    | 0.1029    | -0.0096   | -0.1643   | -0.1526   | -0.1491   |
| <b>20</b>               | 0.0352    | 0.0809    | 0.0174    | -0.0143   | -0.0420   | -0.0172   | -0.0149   |
| <b>21</b>               | 0.0000    | 0.1012    | 0.0444    | -0.0005   | -0.0886   | -0.0636   | -0.0953   |
| <b>22</b>               | 0.0436    | 0.1021    | 0.0414    | 0.0029    | -0.0920   | -0.0492   | -0.0855   |
| <b>23</b>               | 0.0124    | 0.0714    | 0.0094    | 0.0191    | -0.0096   | -0.0068   | -0.0632   |

**Table S7.** The corresponding coefficients of the seven  $\sigma$ -descriptors from 23 CV iterations for TFSI-ion binding energy prediction.

| <b>CV<br/>Iteration</b> | <b>C1</b> | <b>C2</b> | <b>C3</b> | <b>C4</b> | <b>C5</b> | <b>C6</b> | <b>C7</b> |
|-------------------------|-----------|-----------|-----------|-----------|-----------|-----------|-----------|
| <b>1</b>                | 0.0100    | -0.0399   | -0.0084   | 0.0189    | -0.0404   | -0.0117   | -0.0083   |
| <b>2</b>                | 0.0115    | -0.0311   | 0.0015    | 0.0197    | -0.0515   | -0.0193   | -0.0152   |
| <b>3</b>                | 0.0112    | -0.0251   | 0.0001    | 0.0230    | -0.0555   | -0.0215   | -0.0141   |
| <b>4</b>                | 0.0107    | -0.0185   | 0.0034    | 0.0234    | -0.0650   | -0.0279   | -0.0179   |
| <b>5</b>                | 0.0125    | 0.0060    | 0.0228    | 0.0227    | -0.0868   | -0.0443   | -0.0235   |
| <b>6</b>                | 0.0114    | -0.0168   | 0.0066    | 0.0230    | -0.0655   | -0.0286   | -0.0180   |
| <b>7</b>                | 0.0108    | -0.0210   | 0.0027    | 0.0225    | -0.0593   | -0.0246   | -0.0140   |
| <b>8</b>                | 0.0116    | -0.0163   | 0.0073    | 0.0234    | -0.0658   | -0.0295   | -0.0179   |
| <b>9</b>                | 0.0112    | -0.0181   | 0.0056    | 0.0234    | -0.0636   | -0.0276   | -0.0174   |
| <b>10</b>               | 0.0120    | -0.0065   | 0.0145    | 0.0231    | -0.0732   | -0.0346   | -0.0198   |
| <b>11</b>               | 0.0112    | -0.0186   | 0.0053    | 0.0227    | -0.0621   | -0.0267   | -0.0160   |
| <b>12</b>               | 0.0116    | -0.0127   | 0.0097    | 0.0221    | -0.0671   | -0.0303   | -0.0173   |
| <b>13</b>               | 0.0117    | -0.0089   | 0.0157    | 0.0185    | -0.0756   | -0.0406   | -0.0212   |
| <b>14</b>               | 0.0098    | -0.0305   | -0.0058   | 0.0255    | -0.0570   | -0.0231   | -0.0151   |
| <b>15</b>               | 0.0112    | -0.0197   | 0.0045    | 0.0232    | -0.0621   | -0.0263   | -0.0161   |
| <b>16</b>               | 0.0119    | -0.0163   | 0.0047    | 0.0247    | -0.0647   | -0.0234   | -0.0127   |
| <b>17</b>               | 0.0126    | -0.0195   | -0.0065   | 0.0290    | -0.0665   | -0.0190   | -0.0157   |
| <b>18</b>               | 0.0115    | -0.0173   | 0.0062    | 0.0233    | -0.0642   | -0.0258   | -0.0174   |
| <b>19</b>               | 0.0113    | -0.0093   | 0.0256    | 0.0194    | -0.0862   | -0.0582   | -0.0370   |
| <b>20</b>               | 0.0118    | -0.0105   | 0.0133    | 0.0264    | -0.0780   | -0.0386   | -0.0263   |
| <b>21</b>               | 0.0000    | -0.0160   | 0.0054    | 0.0235    | -0.0546   | -0.0257   | -0.0173   |
| <b>22</b>               | 0.0149    | -0.0205   | 0.0027    | 0.0254    | -0.0570   | -0.0173   | -0.0119   |
| <b>23</b>               | 0.0033    | -0.0247   | -0.0068   | 0.0287    | -0.0283   | -0.0078   | -0.0070   |

**Table S8.** Mean values and standard deviations of the predicted Li<sup>+</sup> binding energy (eV), and TFSI<sup>-</sup> binding energy (eV) of 20 solvents and 3 diluents.

| <b>Compounds</b> | <b>E<sub>B, Li, Mean</sub></b> | <b>E<sub>B, Li, STD</sub></b> | <b>E<sub>B, TFSI, Mean</sub></b> | <b>E<sub>B, TFSI, STD</sub></b> |
|------------------|--------------------------------|-------------------------------|----------------------------------|---------------------------------|
| EC               | -0.7279                        | 0.0084                        | -0.2446                          | 0.0087                          |
| PC               | -0.7608                        | 0.0077                        | -0.2358                          | 0.0105                          |
| FEC              | -0.5634                        | 0.0437                        | -0.2935                          | 0.0048                          |
| VC               | -0.6431                        | 0.0082                        | -0.2095                          | 0.0189                          |
| DMC              | -0.6435                        | 0.0139                        | -0.1635                          | 0.0054                          |
| DEC              | -0.6814                        | 0.0129                        | -0.1415                          | 0.0045                          |
| EMC              | -0.6633                        | 0.0071                        | -0.1536                          | 0.0025                          |
| FEMC             | -0.6478                        | 0.0097                        | -0.2469                          | 0.0044                          |
| GBL              | -0.763                         | 0.004                         | -0.2138                          | 0.0053                          |
| MA               | -0.7008                        | 0.0091                        | -0.1629                          | 0.0046                          |
| EA               | -0.73                          | 0.0074                        | -0.1553                          | 0.0045                          |
| MP               | -0.7961                        | 0.0049                        | -0.1431                          | 0.0021                          |
| DOL              | -0.7354                        | 0.0107                        | -0.1725                          | 0.0036                          |
| THF              | -0.8212                        | 0.0037                        | -0.1319                          | 0.0041                          |
| DME              | -0.7626                        | 0.0058                        | -0.1401                          | 0.0034                          |
| DEE              | -0.8385                        | 0.0054                        | -0.1348                          | 0.0038                          |
| FDMB             | -0.7708                        | 0.0077                        | -0.2074                          | 0.0012                          |
| TMS              | -0.7659                        | 0.0058                        | -0.2324                          | 0.0051                          |
| PES              | -0.626                         | 0.0063                        | -0.2449                          | 0.0053                          |
| DMAC             | -0.9348                        | 0.0047                        | -0.1566                          | 0.0032                          |
| TTE              | -0.4597                        | 0                             | -0.2971                          | 0                               |
| BTFE             | -0.648                         | 0.0094                        | -0.3126                          | 0.0056                          |
| TFEO             | -0.6468                        | 0.0043                        | -0.3638                          | 0.0016                          |

## References

1. *CRC handbook of chemistry and physics*, Cleveland, Ohio : CRC Press, c1977-, 1977.
2. M. S. Ding, *J. Chem. Eng. Data.*, 2004, **49**, 276-282.
3. A. Jänes, T. Thomberg, J. Eskusson and E. Lust, *J. Electrochem. Soc.*, 2013, **160**, A1025.
4. Q.-K. Zhang, X.-Q. Zhang, H. Yuan and J.-Q. Huang, *Small Science*, 2021, **1**, 2100058.
5. R. Naejus, C. Damas, D. Lemordant, R. Coudert and P. Willmann, *J. Chem. Thermodyn.*, 2002, **34**, 795-806.
6. J. Ahlers, J. Lohmann and J. Gmehling, *J. Chem. Eng. Data.*, 1999, **44**, 727-730.
